# Supplementary material for: Effect of different silica coatings on the toxicity of upconversion nanoparticles on RAW 264.7 macrophage cells
Source: publisher site journal article supplement (doi:10.3762/bjnano.12.3), 2021-01-08
Supplement: Additional file 1 [file 2190-4286-12-3-S1.pdf]

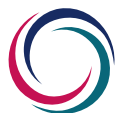

## Supporting Information

for

### **Effect of different silica coatings on the toxicity of upconversion nanoparticles on RAW 264.7 macrophage cells**

Cynthia Kembuan, Helena Oliveira and Christina Graf

*Beilstein J. Nanotechnol.* **2021**, *12*, 35–48. [doi:10.3762/bjnano.12.3](https://doi.org/10.3762/bjnano.12.3)

**Experimental details, additional UC luminescence spectra, XRD data, STEM images, ICP-OES, and cell cycle data**

## **X-ray diffraction (XRD)**

For XRD measurements, a minimum amount of 10 mg dried samples were used. The XRD device was a STOE Stadi P from STOE. A Cu K $\alpha_1$  radiation source with a radiation wavelength of 0.15405 nm was used. The measurement angle was between 10-90° and with a measurement time of 120 s/0.2°.

## **Measurements of the upconversion luminescence**

The upconversion luminescence (UCL) was measured at 25°C with a *FluoroMax-4* spectrometer from *Horiba Jobin Yvon* equipped with a 2 W 980 nm laser diode from *Insaneware-Robert Nowak*. The concentration of the samples was 1-2 g/L in cyclohexane for oleate-capped UCNPs or ethanol for silica-coated UCNPs, and quartz glass cuvettes (*QS Suprasil*, 5 mm, *Hellma* or *VWR*) were used.

## **Inductively coupled plasma-optical emission spectroscopy (ICP-OES)**

The elemental composition of the UCNP cores was determined by ICP-OES. For this purpose, 1 mL ( $c = 5$  g/L) of their dispersion in cyclohexane was dried. The dried UCNPs were subsequently dissolved in 1 mL of aqua regia for 30 minutes and diluted with 5 mL of ultrapure water. The measurements were performed with an iCAP 6000 Series ICP Spectrometer from Thermo Scientific with a radial optical approach. For calibration, series of solutions with different concentrations were prepared separately from an erbium standard for ICP ( $c(\text{Er}^{3+}) = 1, 5, 10$  ppm), ytterbium standard for ICP ( $c(\text{Yb}^{3+}) = 10, 20, 40$  ppm), and an yttrium standard for ICP ( $c(\text{Y}^{3+}) = 10, 20$  and 40 ppm).

## X-ray diffraction measurements

The XRD diffractogram (Figure S1) shows a predominantly hexagonal crystal structure for example at 18°, 29°, 44° and 54° (ICDD no. 28-1192), with two minor peaks from the  $\alpha$ -phase at 47° for [220] reflex and 55° for [311] reflex (ICDD no. 06-0334; see Figure S1).

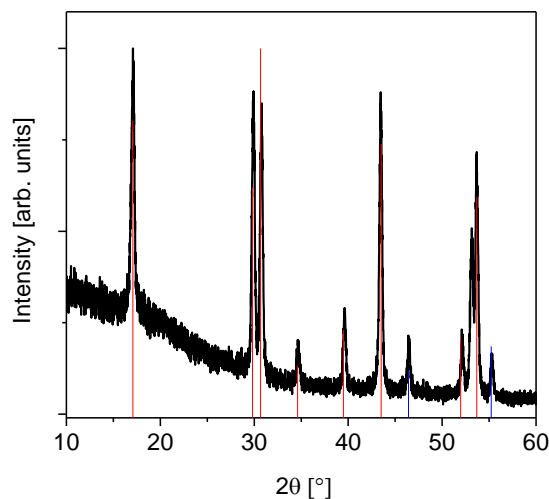

**Figure S1:** XRD diffractogram of the NaYF<sub>4</sub>: Yb, Er cores (red lines: hexagonal phase peaks (ICDD no. 28-1192); blue lines: cubic phase peaks (ICDD no. 06-0334)).

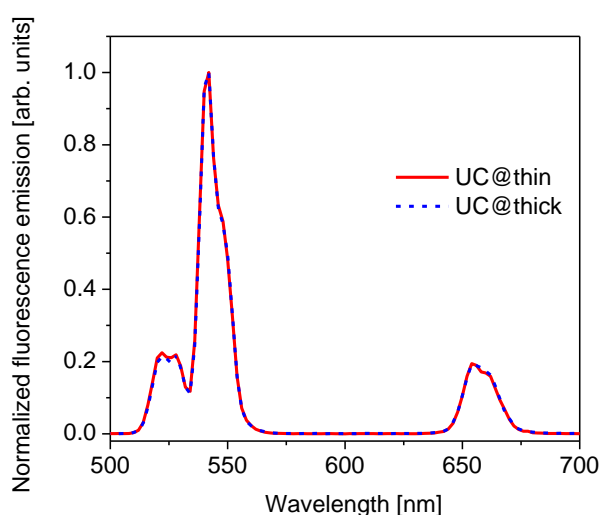

**Figure S2:** Upconversion luminescence spectra of UC@thin\_NH<sub>2</sub> ( $r_{\text{SiO}_2} = 8 \pm 2$  nm) and UC@thick\_NH<sub>2</sub> ( $r_{\text{SiO}_2} = 21 \pm 2$  nm) in ethanol. The cores of both particles are NaYF<sub>4</sub>: 18% Yb, 2% Er nanoparticles. The spectra are normalized at 655 nm for better comparison. The excitation power density was 2 W/cm<sup>2</sup> at 980 nm.

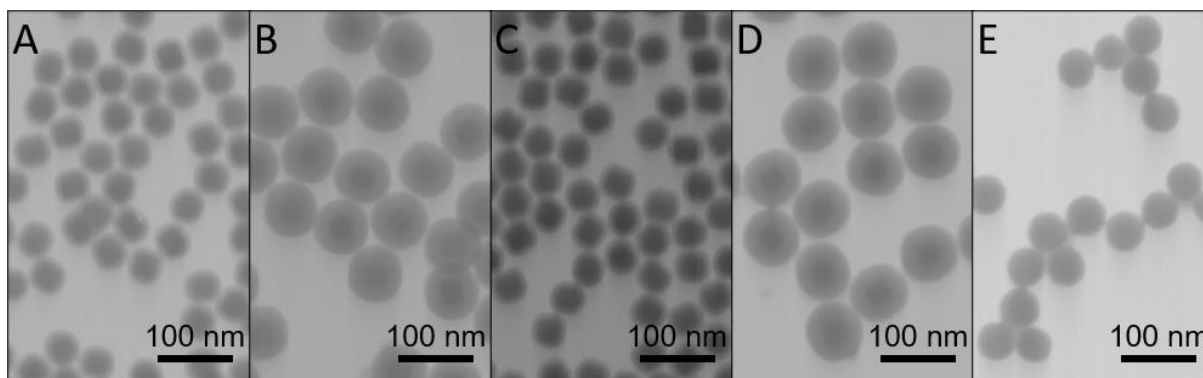

**Figure S3:** STEM images of A: UC@thin\_NH<sub>2</sub> ( $r_{\text{SiO}_2} = 8 \pm 2$  nm); B: UC@thick\_NH<sub>2</sub> ( $r_{\text{SiO}_2} = 21 \pm 2$  nm); C: UC@thin\_RBITC\_NH<sub>2</sub> ( $r_{\text{SiO}_2} = 9 \pm 2$  nm); D: UC@thick\_RBITC\_NH<sub>2</sub> ( $r_{\text{SiO}_2} = 22 \pm 2$  nm) and E: functionalized SiO<sub>2</sub>-nanoparticles SiO<sub>2</sub>@RBITC\_NH<sub>2</sub> (average STEM-diameter =  $52 \pm 3$  nm). The cores of all particles are NaYF<sub>4</sub>: 18% Yb, 2% Er nanoparticles

**Table S1:** Filtered lanthanide ions value from the corresponding chlorides obtained from ICP-OES measurement.

| Initial ions concentration | Y                               |                   | Yb                              |                   | Er                              |                   |
|----------------------------|---------------------------------|-------------------|---------------------------------|-------------------|---------------------------------|-------------------|
| [ppm]                      | Concentration [mmol/L]          | Ions filtered [%] | Concentration [mmol/L]          | Ions filtered [%] | Concentration [mmol/L]          | Ions filtered [%] |
| 1                          | $[4.30 \pm 0.05] \cdot 10^{-3}$ | $38 \pm 3$        | $[1.00 \pm 0.01] \cdot 10^{-3}$ | $17 \pm 2$        | $[3.32 \pm 0.05] \cdot 10^{-4}$ | $6.0 \pm 0.6$     |
| 2                          | $[1.00 \pm 0.01] \cdot 10^{-2}$ | $45 \pm 4$        | $[2.40 \pm 0.01] \cdot 10^{-3}$ | $21 \pm 2$        | $[7.48 \pm 0.05] \cdot 10^{-4}$ | $6.4 \pm 0.6$     |

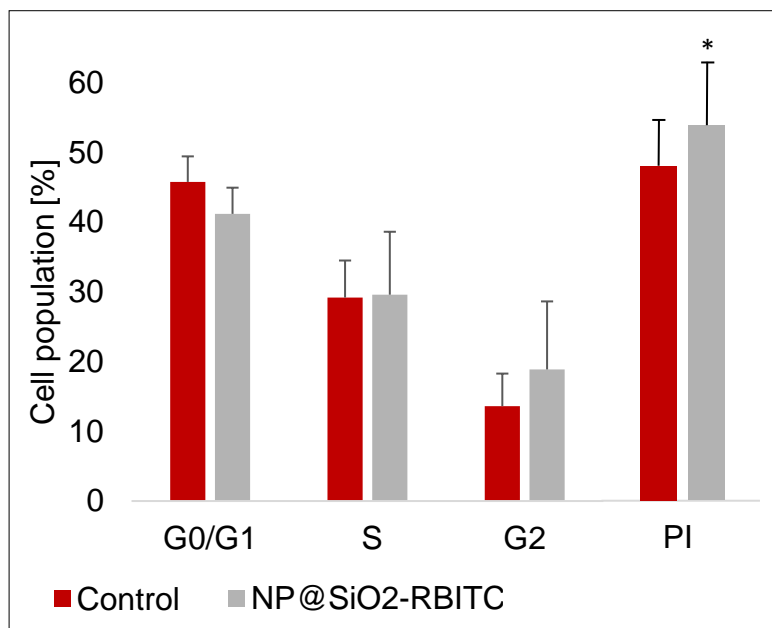

**Figure S4:** Effect of silica particles without a UCNP core (NP@SiO<sub>2</sub>-RBITC-NH<sub>2</sub>) on the cell cycle dynamics of RAW 264.7 macrophages after 24 h of exposure. The concentration was 200 µg/mL.
